# Supplementary material
Source: MDPI journal article supplement (https://www.mdpi.com/2673-7655/1/3/13)
Supplement: s1 [file s1]

**Table S1.** Confidence interval on pairwise  $F_{ST}$  matrix between the six studied sites using 100 bootstrap. Above diagonal = upper limit, below diagonal = lower limit.

|                   |            | Bama   |        | Banzon |        | Karfiguela |            |
|-------------------|------------|--------|--------|--------|--------|------------|------------|
| Geographical zone | Study site | Badala | Bama   | Senzon | Banzon | Tengrela   | Karfiguela |
| Bama              | Badala     | NA     | 0.010  | 0.021  | 0.067  | 0.309      | 0.0378     |
|                   | Bama       | -0.005 | NA     | -0.014 | -0.009 | 0.272      | 0.0182     |
| Banzon            | Senzon     | 0.005  | -0.026 | NA     | -0.019 | 0.300      | 0.050      |
|                   | Banzon     | 0.046  | -0.018 | -0.029 | NA     | 0.347      | 0.116      |
| Karfiguela        | Tengrela   | 0.280  | 0.240  | 0.268  | 0.311  | NA         | 0.276      |
|                   | Karfiguela | 0.024  | 0.004  | 0.033  | 0.099  | 0.245      | NA         |
